# Supplementary material
Source: PubMed Central journal article supplement (PMC7375939)

# Figure S2

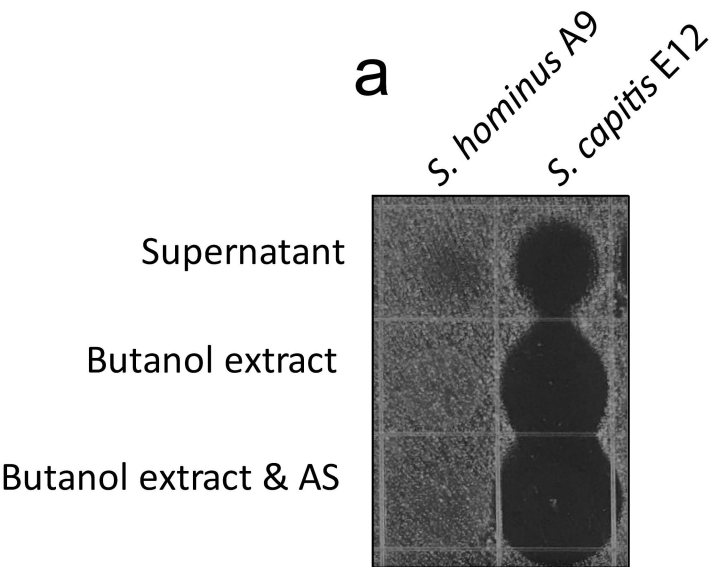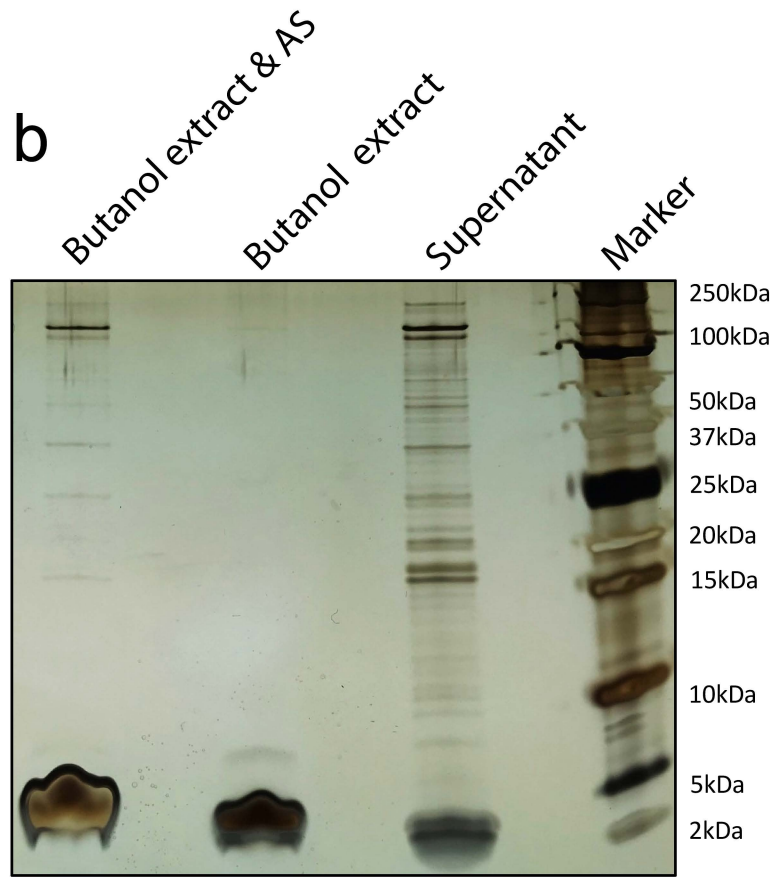

# Figure S3

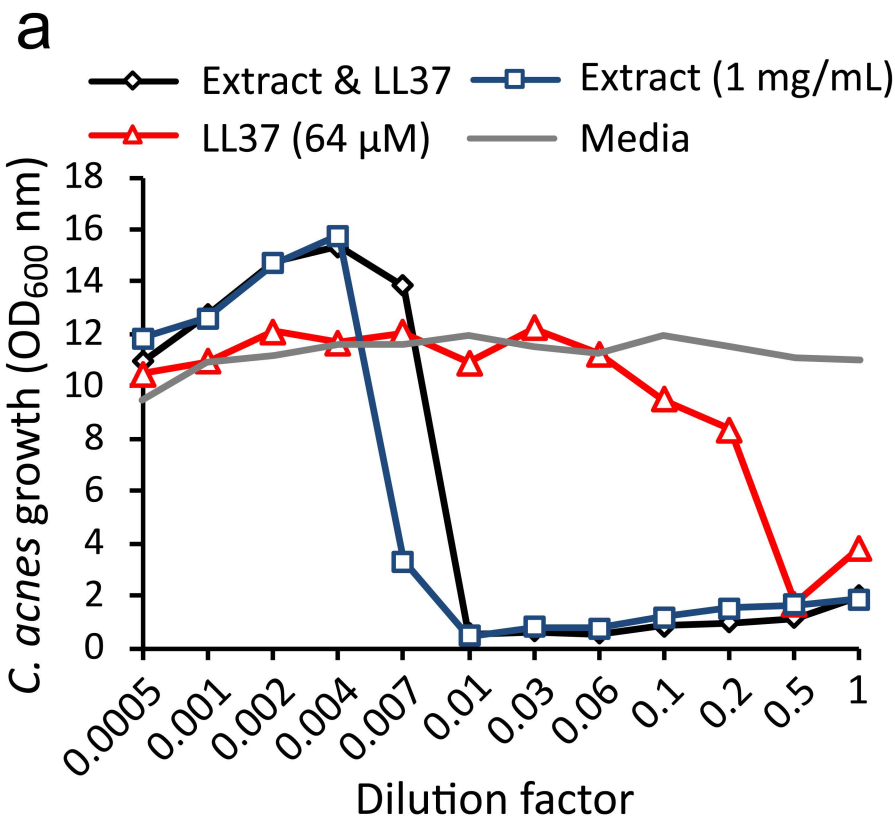

# Figure S4

## a

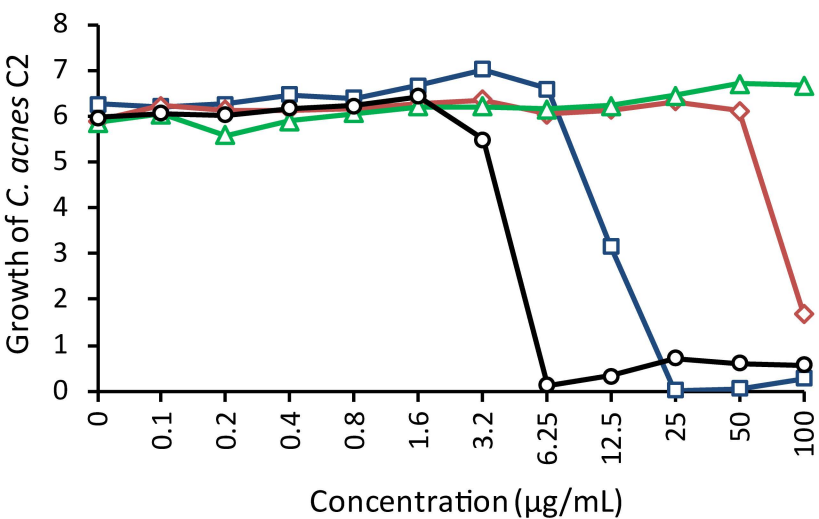

## b

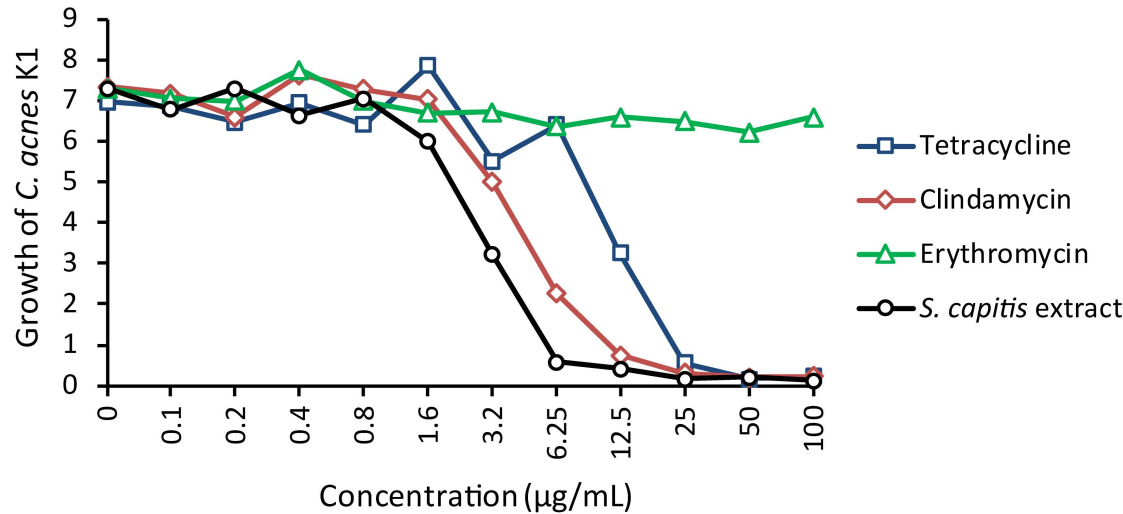

## c

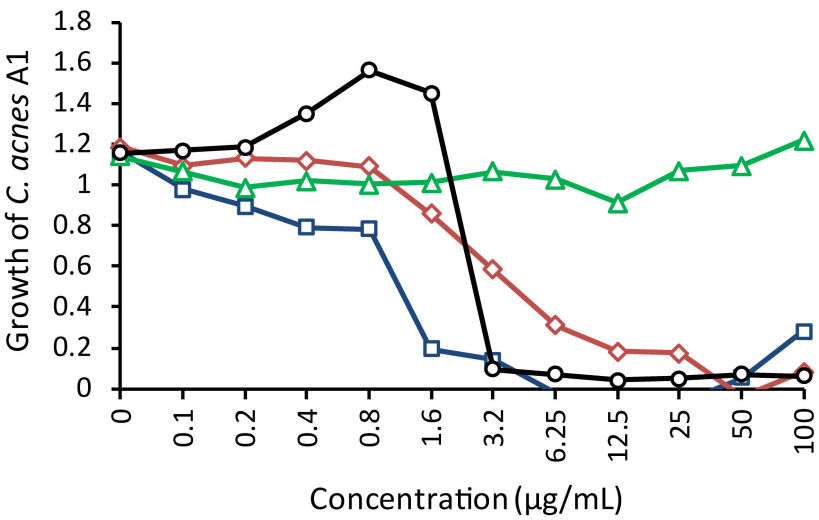

## d

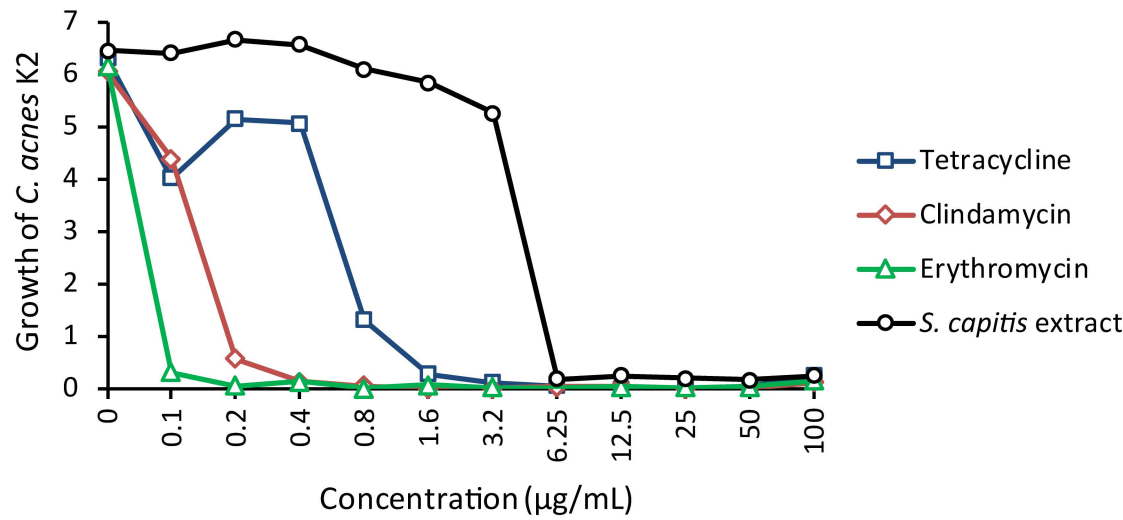

Supplement: NIHMS1551566-supplement-1.pdf [file NIHMS1551566-supplement-1.pdf]
